# Supplementary material
Source: MDPI journal article supplement (https://www.mdpi.com/1999-4907/12/5/649)
Supplement: s1 [file s1]

## **Forests Supporting Information**

Article title:

### **Classification of Tree Functional Types in a Megadiverse Tropical Mountain Forest from Leaf Optical Metrics and Functional Traits for Two Related Ecosystem Functions**

Authors:

Limberger, O., Homeier, J., Farwig, N., Pucha-Cofrep, F., Fries, A., Leuschner, C., Trachte, K., Bendix, J.

Article acceptance date:

The following Supporting Information is available for this article:

**Table S1:** Mean and standard deviation of climate variables for the study site by elevation.

|                                       | <b>1051 m</b><br><b>4.11444° S, 78.965° W</b>     | <b>1957 m</b><br><b>3.964° S, 79.077° W</b> | <b>3400 m</b><br><b>4.10432° S, 79.1611° W</b>         |
|---------------------------------------|---------------------------------------------------|---------------------------------------------|--------------------------------------------------------|
|                                       | <b>Bombuscaro<sup>1</sup></b><br><b>2007-2018</b> | <b>ECSF<sup>2</sup></b><br><b>1998-2018</b> | <b>Cajanuma Paramo<sup>3</sup></b><br><b>1998-2018</b> |
| <b>Rain (mm/day)</b>                  |                                                   |                                             |                                                        |
| Mean                                  | 5.0                                               | 5.5                                         | 6.8                                                    |
| sd                                    | 6.9                                               | 7.8                                         | 8.3                                                    |
| <b>Radiation</b>                      |                                                   |                                             |                                                        |
| <b>daily max (W/m<sup>2</sup>)</b>    |                                                   |                                             |                                                        |
| Mean                                  | 571.5                                             | 577.2                                       | 516.7                                                  |
| sd                                    | 349.1                                             | 460.7                                       | 231.4                                                  |
| <b>daily total (MJ/m<sup>2</sup>)</b> |                                                   |                                             |                                                        |
| Mean                                  | 9.8                                               | 12.5                                        | 10.8                                                   |
| sd                                    | 5.2                                               | 6.3                                         | 5.0                                                    |
| <b>Temperature (°C)</b>               |                                                   |                                             |                                                        |
| Mean                                  | 19.9                                              | 14.6                                        | 6.5                                                    |
| sd                                    | 3.3                                               | 1.3                                         | 1.0                                                    |

<sup>1</sup>Peters, T. ; Richter, M. (2009): Climate Station Data at Bombuscaro. Available online ([http://www.tropicalmountainforest.org/data\\_pre.do?citid=501](http://www.tropicalmountainforest.org/data_pre.do?citid=501)) from DFG-FOR816dw.

<sup>1</sup>Dobbermann, M.; Bendix, J.; Werner, N. (2018): Climate station data from Bombuscaro Thies station 2018. Available online ([http://www.tropicalmountainforest.org/data\\_pre.do?citid=1712](http://www.tropicalmountainforest.org/data_pre.do?citid=1712)) from DFG-FOR816dw.

<sup>2</sup>Bendix, J. (2020): ECSF Climate station best estimate Ver. 3 1998 – 2020. Available online ([http://www.tropicalmountainforest.org/data\\_pre.do?citid=1876](http://www.tropicalmountainforest.org/data_pre.do?citid=1876)) from DFG-FOR816dw.

<sup>3</sup>Bendix, J. (2020): Climate Station Data Cajanuma Paramo - daily estimate 1998 – 2018. Available online ([http://www.tropicalmountainforest.org/data\\_pre.do?citid=1858](http://www.tropicalmountainforest.org/data_pre.do?citid=1858)) from DFG-FOR816dw.

**Table S2.** Overview of sampled species. MidSucTall = tall mid-successional trees, MidSucSmall = small mid-successional trees, LateSucTall = tall late-successional trees, LateSucSmall = small late-successional trees, EarlySuc = early successional trees.

| Genus species            | Family          | Elevation (m) | Successional stage |
|--------------------------|-----------------|---------------|--------------------|
| Saurauia JH5994          | Actinidiaceae   | 1000          | Pioneer            |
| Alchornea cf glandulosa  | Euphorbiaceae   | 1000          | Pioneer            |
| Miconia aff. punctata    | Melastomataceae | 1000          | Pioneer            |
| Pourouma cecropiifolia   | Urticaceae      | 1000          | Pioneer            |
| Parkia sp1               | Fabaceae        | 1000          | MidSucTall         |
| Mollia gracilis          | Malvaceae       | 1000          | MidSucTall         |
| Otoba parvifolia         | Myristicaceae   | 1000          | MidSucTall         |
| Ladenbergia oblongifolia | Rubiaceae       | 1000          | MidSucTall         |
| Guatteria pastazae       | Annonaceae      | 1000          | MidSucSmall        |
| Ocotea JH6030            | Lauraceae       | 1000          | MidSucSmall        |
| Hieronyma oblonga        | Phyllanthaceae  | 1000          | MidSucSmall        |
| Warszewiczia coccinea    | Rubiaceae       | 1000          | MidSucSmall        |
| Aspidosperma rigidum     | Apocynaceae     | 1000          | LateSucTall        |
| Clarisia racemosa        | Moraceae        | 1000          | LateSucTall        |
| Pouteria torta           | Sapotaceae      | 1000          | LateSucTall        |
| Leonia crassa            | Violaceae       | 1000          | LateSucTall        |
| Chrysochlamys sp.        | Clusiaceae      | 1000          | LateSucSmall       |
| Grias peruviana          | Lecythidaceae   | 1000          | LateSucSmall       |
| Guarea macrophylla       | Meliaceae       | 1000          | LateSucSmall       |
| Pseudolmedia laevis      | Moraceae        | 1000          | LateSucSmall       |

|                          |                 |      |              |
|--------------------------|-----------------|------|--------------|
| Hedyosmum cf goudotianum | Chloranthaceae  | 2000 | Pioneer      |
| Heliocarpus americanus   | Malvaceae       | 2000 | Pioneer      |
| Miconia calophylla       | Melastomataceae | 2000 | Pioneer      |
| Cecropia angustifolia    | Urticaceae      | 2000 | Pioneer      |
| Tapirira guianensis      | Anacardiaceae   | 2000 | MidSucTall   |
| Alchornea lojaensis      | Euphorbiaceae   | 2000 | MidSucTall   |
| Meriania franciscana     | Melastomataceae | 2000 | MidSucTall   |
| Ruagea glabra            | Meliaceae       | 2000 | MidSucTall   |
| Ocotea andina            | Lauraceae       | 2000 | MidSucSmall  |
| Graffenrieda emarginata  | Melastomataceae | 2000 | MidSucSmall  |
| Hieronyma fendleri       | Phyllanthaceae  | 2000 | MidSucSmall  |
| Myrsine coriacea         | Primulaceae     | 2000 | MidSucSmall  |
| Alzatea verticillata     | Alzateaceae     | 2000 | LateSucTall  |
| Clusia ducuoides         | Clusiaceae      | 2000 | LateSucTall  |
| Naucleopsis francisci    | Moraceae        | 2000 | LateSucTall  |
| Podocarpus oleifolius    | Podocarpaceae   | 2000 | LateSucTall  |
| Weinmannia microphylla   | Cunoniaceae     | 2000 | LateSucSmall |
| Myrcia spnov             | Myrtaceae       | 2000 | LateSucSmall |
| Elaeagia mollis          | Rubiaceae       | 2000 | LateSucSmall |
| Matayba inelegans        | Sapindaceae     | 2000 | LateSucSmall |
| Critoniopsis pycnantha   | Asteraceae      | 3000 | EarlySuc     |
| Hedyosmum purpurascens   | Chloranthaceae  | 3000 | EarlySuc     |

|                         |                 |      |              |
|-------------------------|-----------------|------|--------------|
| Miconia cf jahnii       | Melastomataceae | 3000 | EarlySuc     |
| Siparuna muricata       | Siparunaceae    | 3000 | EarlySuc     |
| Oreopanax sessiliflorus | Araliaceae      | 3000 | LateSucTall  |
| Aiouea dubia            | Lauraceae       | 3000 | LateSucTall  |
| Ocotea rotundata        | Lauraceae       | 3000 | LateSucTall  |
| Ilex laurina            | Aquifoliaceae   | 3000 | LateSucSmall |
| Clethra revoluta        | Clethraceae     | 3000 | LateSucSmall |
| Clusia elliptica        | Clusiaceae      | 3000 | LateSucSmall |
| Gordonia fruticosa      | Theaceae        | 3000 | LateSucSmall |
| Weinmannia elliptica    | Cunoniaceae     | 3000 | --           |

**Table S3.** Species affiliation to TFT for productivity (P). Bold TFT numbers indicate the reference species (cluster center) of the respective TFT. Tree successional stages (Suc) were determined a priori from pre-existing measurements for specific leaf area and wood specific gravity and further separated by tree height. Biochemical leaf traits were calculated with respect to dry mass. LWC = leaf water content, SLA = specific leaf area.

| TFT       | Genus species           | Family          | Elevation (m) | Successional stage | SLA (cm/g) | total leaf area (cm <sup>2</sup> ) | leaf thickness (mm) | C (mg/g) | N (mg/g) | P (mg/g) | C/N ratio | N/P ratio | LWC (mg/g) |
|-----------|-------------------------|-----------------|---------------|--------------------|------------|------------------------------------|---------------------|----------|----------|----------|-----------|-----------|------------|
| P1        | Oreopanax sessiliflorus | Araliaceae      | 3000          | LateSucTall        | 54.77      | 34.97                              | 0.39                | 479.91   | 15.46    | NA       | 31.32     | NA        | 615.45     |
| P1        | Clusia elliptica        | Clusiaceae      | 3000          | LateSucSmall       | 43.63      | 21.11                              | 0.59                | 497.91   | 10.52    | 0.68     | 47.39     | 15.96     | 672.37     |
| <b>P1</b> | Miconia cf jahnii       | Melastomataceae | 3000          | EarlySuc           | 39.72      | 13.62                              | 0.50                | 442.13   | 10.79    | 0.57     | 42.14     | 19.12     | 591.30     |
| P2        | Alzatea verticillata    | Alzateaceae     | 2000          | LateSucTall        | 57.77      | 39.73                              | 0.41                | 493.44   | 10.59    | 0.81     | 46.67     | 13.09     | 620.12     |
| <b>P2</b> | Ilex laurina            | Aquifoliaceae   | 3000          | LateSucSmall       | 53.87      | 11.82                              | 0.35                | 498.72   | 11.45    | 0.70     | 44.09     | 16.84     | 498.16     |
| P2        | Ocotea rotundata        | Lauraceae       | 3000          | LateSucTall        | 49.43      | 29.66                              | 0.43                | 490.21   | 14.70    | 0.99     | 36.33     | 15.55     | 556.15     |
| P2        | Ocotea andina           | Lauraceae       | 2000          | MidSucSmall        | 51.21      | 103.14                             | 0.36                | 528.21   | 16.15    | 0.97     | 32.95     | 17.06     | 540.47     |
| P2        | Graffenrieda emarginata | Melastomataceae | 2000          | MidSucSmall        | 64.22      | 310.47                             | 0.35                | NA       | NA       | NA       | NA        | NA        | 603.04     |
| P2        | Naucleopsis francisci   | Moraceae        | 2000          | LateSucTall        | 49.00      | 56.63                              | 0.35                | 478.31   | 19.46    | 0.89     | 24.63     | 22.03     | 562.66     |
| P2        | Hieronyma fendleri      | Phyllanthaceae  | 2000          | MidSucSmall        | 90.68      | 22.78                              | 0.31                | 475.92   | 15.10    | 1.01     | 31.59     | 15.08     | 671.74     |

|           |                          |                 |      |              |       |       |      |        |       |      |       |       |        |
|-----------|--------------------------|-----------------|------|--------------|-------|-------|------|--------|-------|------|-------|-------|--------|
| P2        | Myrsine coriacea         | Primulaceae     | 2000 | MidSucSmall  | 69.46 | 15.40 | 0.32 | 525.54 | 12.10 | 0.67 | 46.39 | 17.98 | 608.41 |
| P3        | Critoniopsis pycnantha   | Asteraceae      | 3000 | EarlySuc     | 52.38 | 25.49 | 0.36 | 480.75 | 14.66 | 0.93 | 32.96 | 15.77 | 582.23 |
| P3        | Hedyosmum purpurascens   | Chloranthaceae  | 3000 | EarlySuc     | 72.50 | 13.82 | 0.44 | 450.08 | 18.72 | 1.07 | 24.21 | 17.71 | 733.97 |
| P3        | Hedyosmum cf goudotianum | Chloranthaceae  | 2000 | Pioneer      | 88.52 | 41.01 | 0.38 | NA     | NA    | NA   | NA    | NA    | 766.22 |
| P3        | Clusia ducuoides         | Clusiaceae      | 2000 | LateSucTall  | 59.41 | 19.59 | 0.53 | 494.24 | 12.34 | 0.78 | 40.14 | 16.04 | 726.64 |
| P3        | Weinmannia elliptica     | Cunoniaceae     | 3000 |              | 52.24 | 3.16  | 0.40 | 473.56 | 9.86  | 0.52 | 49.07 | 18.96 | NA     |
| P3        | Alchornea lojaensis      | Euphorbiaceae   | 2000 | MidSucTall   | 47.55 | 34.38 | 0.48 | 534.17 | 15.07 | 1.15 | 36.04 | 13.35 | 629.87 |
| P3        | Miconia calophylla       | Melastomataceae | 2000 | Pioneer      | 61.56 | 52.68 | 0.34 | 488.88 | 13.09 | 0.71 | 37.60 | 18.48 | 687.39 |
| P3        | Ruagea glabra            | Meliaceae       | 2000 | MidSucTall   | 84.64 | 37.67 | 0.30 | NA     | NA    | NA   | NA    | NA    | 668.87 |
| P3        | Myrcia spnov             | Myrtaceae       | 2000 | LateSucSmall | 44.53 | 37.80 | 0.48 | 482.31 | 10.37 | 0.60 | 46.66 | 17.37 | 576.34 |
| P3        | Podocarpus oleifolius    | Podocarpaceae   | 2000 | LateSucTall  | 61.75 | 6.33  | 0.34 | 490.58 | 11.62 | 0.76 | 42.44 | 15.42 | 595.15 |
| <b>P3</b> | Gordonia fruticosa       | Theaceae        | 3000 | LateSucSmall | 63.03 | 4.60  | 0.39 | 478.33 | 13.78 | 0.69 | 35.94 | 20.37 | 569.36 |
| P4        | Clethra revoluta         | Clethraceae     | 3000 | LateSucSmall | 55.09 | 38.35 | 0.39 | 481.53 | 14.44 | 0.97 | 33.54 | 14.96 | 636.15 |

|           |                           |                 |      |              |        |        |      |        |       |      |       |       |        |
|-----------|---------------------------|-----------------|------|--------------|--------|--------|------|--------|-------|------|-------|-------|--------|
| P4        | Weinmannia<br>microphylla | Cunoniaceae     | 2000 | LateSucSmall | 98.83  | 7.23   | 0.24 | 480.80 | 12.75 | 0.70 | 38.06 | 18.49 | 608.50 |
| P4        | Aiouea dubia              | Lauraceae       | 3000 | LateSucTall  | 58.23  | 17.22  | 0.34 | 488.12 | 17.59 | 1.13 | 28.16 | 15.70 | 574.77 |
| P4        | Matayba<br>inelegans      | Sapindaceae     | 2000 | LateSucSmall | 95.76  | 26.62  | 0.22 | 501.03 | 25.17 | 1.33 | 20.00 | 19.01 | 618.16 |
| <b>P4</b> | Siparuna<br>muricata      | Siparunaceae    | 3000 | EarlySuc     | 86.99  | 41.98  | 0.29 | 457.38 | 29.64 | 2.34 | 15.68 | 12.86 | 788.03 |
| <b>P5</b> | Miconia aff<br>punctata   | Melastomataceae | 1000 | Pioneer      | 96.10  | 100.75 | 0.28 | 491.05 | 23.58 | 0.70 | 20.87 | 33.71 | 645.44 |
| P6        | Tapirira<br>guianensis    | Anacardiaceae   | 2000 | MidSucTall   | 76.93  | 78.59  | NA   | NA     | NA    | NA   | NA    | NA    | NA     |
| P6        | Guatteria<br>pastazae     | Annonaceae      | 1000 | MidSucSmall  | 97.98  | 94.33  | 0.22 | 477.03 | 17.22 | 0.71 | 27.94 | 24.20 | 577.33 |
| P6        | Aspidosperma<br>rigidum   | Apocynaceae     | 1000 | LateSucTall  | 159.63 | 53.76  | 0.26 | 447.44 | 25.22 | 1.79 | 17.81 | 14.31 | 737.67 |
| P6        | Chrysochlamys<br>sp       | Clusiaceae      | 1000 | LateSucSmall | 100.99 | 167.80 | 0.43 | 428.34 | 14.66 | 0.80 | 29.35 | 19.42 | 749.33 |
| P6        | Parkia sp1                | Fabaceae        | 1000 | MidSucTall   | 149.09 | 13.70  | 0.13 | 473.09 | 35.43 | 1.78 | 13.50 | 20.92 | 567.45 |
| P6        | Ocotea JH6030             | Lauraceae       | 1000 | MidSucSmall  | 101.09 | 235.37 | 0.30 | 485.18 | 22.75 | 2.65 | 21.49 | 15.31 | 686.17 |
| P6        | Grias peruviana           | Lecythidaceae   | 1000 | LateSucSmall | 72.83  | 353.23 | 0.22 | 445.13 | 15.46 | 1.30 | 28.96 | 12.06 | 659.25 |
| P6        | Guarea<br>macrophylla     | Meliaceae       | 1000 | LateSucSmall | 145.00 | 80.84  | 0.20 | 465.18 | 27.54 | 2.07 | 16.94 | 13.81 | 710.98 |
| P6        | Clarisia<br>racemosa      | Moraceae        | 1000 | LateSucTall  | 119.29 | 39.36  | 0.17 | 445.95 | 22.19 | 1.20 | 20.17 | 19.06 | 604.12 |



|           |                          |                 |      |              |        |         |      |        |       |      |       |       |        |
|-----------|--------------------------|-----------------|------|--------------|--------|---------|------|--------|-------|------|-------|-------|--------|
| P6        | Otoba parvifolia         | Myristicaceae   | 1000 | MidSucTall   | 98.46  | 97.37   | 0.32 | 477.55 | 15.63 | 0.91 | 30.76 | 17.44 | 718.44 |
| P6        | Hieronyma oblonga        | Phyllanthaceae  | 1000 | MidSucSmall  | 133.01 | 65.77   | 0.24 | 463.99 | 19.19 | 1.06 | 24.27 | 18.26 | 750.47 |
| P6        | Ladenbergia oblongifolia | Rubiaceae       | 1000 | MidSucTall   | 87.77  | 322.11  | 0.27 | 483.52 | 17.35 | 1.03 | 28.12 | 17.45 | 613.09 |
| P6        | Pourouma cecropiifolia   | Urticaceae      | 1000 | Pioneer      | 81.49  | 1632.01 | 0.21 | 468.05 | 18.85 | 0.90 | 25.12 | 21.26 | 0.00   |
| P6        | Cecropia angustifolia    | Urticaceae      | 2000 | Pioneer      | 60.14  | 1354.33 | 0.28 | NA     | NA    | NA   | NA    | NA    | 653.67 |
| <b>P6</b> | Leonia crassa            | Violaceae       | 1000 | LateSucTall  | 93.80  | 180.23  | 0.28 | 449.55 | 20.45 | 1.26 | 22.19 | 16.54 | 680.22 |
| P7        | Saurauia JH5994          | Actinidiaceae   | 1000 | Pioneer      | 129.13 | 239.50  | 0.21 | 448.41 | 19.04 | 1.26 | 23.68 | 15.72 | 737.71 |
| P7        | Alchornea cf glandulosa  | Euphorbiaceae   | 1000 | Pioneer      | 164.52 | 72.27   | 0.11 | 459.59 | 26.24 | 1.42 | 17.53 | 18.55 | 609.33 |
| <b>P7</b> | Mollia gracilis          | Malvaceae       | 1000 | MidSucTall   | 157.35 | 75.37   | 0.14 | 469.41 | 24.28 | 1.15 | 19.50 | 21.65 | 624.20 |
| P7        | Heliocarpus americanus   | Malvaceae       | 2000 | Pioneer      | 187.50 | 198.70  | 0.16 | NA     | NA    | NA   | NA    | NA    | 796.38 |
| P7        | Meriania franciscana     | Melastomataceae | 2000 | MidSucTall   | 0.00   | 0.00    | 0.23 | NA     | NA    | NA   | NA    | NA    | 552.75 |
| P7        | Pseudolmedia laevis      | Moraceae        | 1000 | LateSucSmall | 127.28 | 54.15   | 0.16 | 438.45 | 19.63 | 0.84 | 22.41 | 23.49 | 555.33 |
| P7        | Warszewiczia coccinea    | Rubiaceae       | 1000 | MidSucSmall  | 127.20 | 299.63  | 0.19 | 458.79 | 27.81 | 1.18 | 16.93 | 23.76 | 721.83 |
| P7        | Elaeagia mollis          | Rubiaceae       | 2000 | LateSucSmall | 121.95 | 144.23  | 0.24 | NA     | NA    | NA   | NA    | NA    | 718.72 |

|    |                |            |      |             |       |       |      |        |       |      |       |       |        |
|----|----------------|------------|------|-------------|-------|-------|------|--------|-------|------|-------|-------|--------|
| P7 | Pouteria torta | Sapotaceae | 1000 | LateSucTall | 86.02 | 75.43 | 0.17 | 503.68 | 15.85 | 0.69 | 32.15 | 23.80 | 536.21 |
|----|----------------|------------|------|-------------|-------|-------|------|--------|-------|------|-------|-------|--------|

**Table S4.** Species affiliation to TFT for energy fluxes (E). Bold TFT numbers indicate the reference species (cluster center) of the respective TFT. Tree successional stages (Suc) were determined a priori from pre-existing measurements for specific leaf area and wood specific gravity and further separated by tree height. Biochemical leaf traits were calculated with respect to dry mass. LWC = leaf water content. SLA = specific leaf area.

| TFT | Genus species            | Family          | Elevation (m) | Successional stage | SLA (cm/g) | total leaf area (mm) | leaf thickness (mm) | C (mg/g) | N (mg/g) | C/N ratio | N/P ratio | LWC (mg/g) | VIS albedo | NIR albedo |
|-----|--------------------------|-----------------|---------------|--------------------|------------|----------------------|---------------------|----------|----------|-----------|-----------|------------|------------|------------|
| E1  | Miconia aff punctata     | Melastomataceae | 1000          | Pioneer            | 96.10      | 100.75               | 0.28                | 491.05   | 23.58    | 20.87     | 33.71     | 645.44     | 0.07       | 0.25       |
| E2  | Oreopanax sessiliflorus  | Araliaceae      | 3000          | LateSucTall        | 54.77      | 34.97                | 0.39                | 479.91   | 15.46    | 31.32     | 0.00      | 615.45     | 0.07       | 0.24       |
| E2  | Critoniopsis pycnantha   | Asteraceae      | 3000          | EarlySuc           | 52.38      | 25.49                | 0.36                | 480.75   | 14.66    | 32.96     | 15.77     | 582.23     | 0.07       | 0.23       |
| E2  | Miconia cf jahnii        | Melastomataceae | 3000          | EarlySuc           | 39.72      | 13.62                | 0.50                | 442.13   | 10.79    | 42.14     | 19.12     | 591.30     | 0.06       | 0.24       |
| E2  | Ruagea glabra            | Meliaceae       | 2000          | MidSucTall         | 84.64      | 37.67                | 0.30                | NA       | NA       | NA        | NA        | 668.87     | 0.07       | 0.23       |
| E2  | Podocarpus oleifolius    | Podocarpaceae   | 2000          | LateSucTall        | 61.75      | 6.33                 | 0.34                | 490.58   | 11.62    | 42.44     | 15.42     | 595.15     | 0.08       | 0.24       |
| E3  | Clusia elliptica         | Clusiaceae      | 3000          | LateSucSmall       | 43.63      | 21.11                | 0.59                | 497.91   | 10.52    | 47.39     | 15.96     | 672.37     | 0.07       | 0.23       |
| E4  | Alzatea verticillata     | Alzateaceae     | 2000          | LateSucTall        | 57.77      | 39.73                | 0.41                | 493.44   | 10.59    | 46.67     | 13.09     | 620.12     | 0.07       | 0.21       |
| E4  | Ilex laurina             | Aquifoliaceae   | 3000          | LateSucSmall       | 53.87      | 11.82                | 0.35                | 498.72   | 11.45    | 44.09     | 16.84     | 498.16     | 0.06       | 0.20       |
| E4  | Hedyosmum purpurascens   | Chloranthaceae  | 3000          | EarlySuc           | 72.50      | 13.82                | 0.44                | 450.08   | 18.72    | 24.21     | 17.71     | 733.97     | 0.06       | 0.21       |
| E4  | Hedyosmum cf goudotianum | Chloranthaceae  | 2000          | Pioneer            | 88.52      | 41.01                | 0.38                | NA       | NA       | NA        | NA        | 766.22     | 0.06       | 0.21       |
| E4  | Weinmannia elliptica     | Cunoniaceae     | 3000          |                    | 52.24      | 3.16                 | 0.40                | 473.56   | 9.86     | 49.07     | 18.96     | 0.00       | 0.07       | 0.22       |
| E4  | Alchornea lojaensis      | Euphorbiaceae   | 2000          | MidSucTall         | 47.55      | 34.38                | 0.48                | 534.17   | 15.07    | 36.04     | 13.35     | 629.87     | 0.06       | 0.20       |
| E4  | Ocotea rotundata         | Lauraceae       | 3000          | LateSucTall        | 49.43      | 29.66                | 0.43                | 490.21   | 14.70    | 36.33     | 15.55     | 556.15     | 0.07       | 0.22       |

|    |                         |                 |      |              |        |         |      |        |       |       |       |        |      |      |
|----|-------------------------|-----------------|------|--------------|--------|---------|------|--------|-------|-------|-------|--------|------|------|
| E4 | Ocotea andina           | Lauraceae       | 2000 | MidSucSmall  | 51.21  | 103.14  | 0.36 | 528.21 | 16.15 | 32.95 | 17.06 | 540.47 | 0.07 | 0.23 |
| E4 | Graffenrieda emarginata | Melastomataceae | 2000 | MidSucSmall  | 64.22  | 310.47  | 0.35 | 0.00   | 0.00  | 0.00  | 0.00  | 603.04 | 0.06 | 0.20 |
| E4 | Miconia calophylla      | Melastomataceae | 2000 | Pioneer      | 61.56  | 52.68   | 0.34 | 488.88 | 13.09 | 37.60 | 18.48 | 687.39 | 0.07 | 0.22 |
| E4 | Naucleopsis francisci   | Moraceae        | 2000 | LateSucTall  | 49.00  | 56.63   | 0.35 | 478.31 | 19.46 | 24.63 | 22.03 | 562.66 | 0.06 | 0.20 |
| E4 | Myrcia spnov            | Myrtaceae       | 2000 | LateSucSmall | 44.53  | 37.80   | 0.48 | 482.31 | 10.37 | 46.66 | 17.37 | 576.34 | 0.08 | 0.23 |
| E4 | Hieronyma fendleri      | Phyllanthaceae  | 2000 | MidSucSmall  | 90.68  | 22.78   | 0.31 | 475.92 | 15.10 | 31.59 | 15.08 | 671.74 | 0.07 | 0.22 |
| E4 | Myrsine coriacea        | Primulaceae     | 2000 | MidSucSmall  | 69.46  | 15.40   | 0.32 | 525.54 | 12.10 | 46.39 | 17.98 | 608.41 | 0.07 | 0.22 |
| E4 | Gordonia fruticosa      | Theaceae        | 3000 | LateSucSmall | 63.03  | 4.60    | 0.39 | 478.33 | 13.78 | 35.94 | 20.37 | 569.36 | 0.07 | 0.23 |
| E5 | Grias peruviana         | Lecythidaceae   | 1000 | LateSucSmall | 72.83  | 353.23  | 0.22 | 445.13 | 15.46 | 28.96 | 12.06 | 659.25 | 0.09 | 0.21 |
| E5 | Heliocarpus americanus  | Malvaceae       | 2000 | Pioneer      | 187.50 | 198.70  | 0.16 | 0.00   | 0.00  | 0.00  | 0.00  | 796.38 | 0.08 | 0.18 |
| E5 | Clarisia racemosa       | Moraceae        | 1000 | LateSucTall  | 119.29 | 39.36   | 0.17 | 445.95 | 22.19 | 20.17 | 19.06 | 604.12 | 0.10 | 0.23 |
| E5 | Pourouma cecropiifolia  | Urticaceae      | 1000 | Pioneer      | 81.49  | 1632.01 | 0.21 | 468.05 | 18.85 | 25.12 | 21.26 | 0.00   | 0.10 | 0.21 |
| E6 | Tapirira guianensis     | Anacardiaceae   | 2000 | MidSucTall   | 76.93  | 78.59   | NA   | NA     | NA    | NA    | NA    | NA     | 0.06 | 0.20 |
| E6 | Guatteria pastazae      | Annonaceae      | 1000 | MidSucSmall  | 97.98  | 94.33   | 0.22 | 477.03 | 17.22 | 27.94 | 24.20 | 577.33 | 0.07 | 0.20 |
| E6 | Aspidosperma rigidum    | Apocynaceae     | 1000 | LateSucTall  | 159.63 | 53.76   | 0.26 | 447.44 | 25.22 | 17.81 | 14.31 | 737.67 | 0.08 | 0.22 |
| E6 | Alchornea cf glandulosa | Euphorbiaceae   | 1000 | Pioneer      | 164.52 | 72.27   | 0.11 | 459.59 | 26.24 | 17.53 | 18.55 | 609.33 | 0.08 | 0.20 |
| E6 | Parkia sp1              | Fabaceae        | 1000 | MidSucTall   | 149.09 | 13.70   | 0.13 | 473.09 | 35.43 | 13.50 | 20.92 | 567.45 | 0.08 | 0.21 |
| E6 | Ocotea JH6030           | Lauraceae       | 1000 | MidSucSmall  | 101.09 | 235.37  | 0.30 | 485.18 | 22.75 | 21.49 | 15.31 | 686.17 | 0.07 | 0.22 |
| E6 | Mollia gracilis         | Malvaceae       | 1000 | MidSucTall   | 157.35 | 75.37   | 0.14 | 469.41 | 24.28 | 19.50 | 21.65 | 624.20 | 0.08 | 0.20 |

|    |                          |                 |      |              |        |         |      |        |       |       |       |        |      |      |
|----|--------------------------|-----------------|------|--------------|--------|---------|------|--------|-------|-------|-------|--------|------|------|
| E6 | Guarea macrophylla       | Meliaceae       | 1000 | LateSucSmall | 145.00 | 80.84   | 0.20 | 465.18 | 27.54 | 16.94 | 13.81 | 710.98 | 0.07 | 0.21 |
| E6 | Pseudolmedia laevis      | Moraceae        | 1000 | LateSucSmall | 127.28 | 54.15   | 0.16 | 438.45 | 19.63 | 22.41 | 23.49 | 555.33 | 0.07 | 0.20 |
| E6 | Elacagia mollis          | Rubiaceae       | 2000 | LateSucSmall | 121.95 | 144.23  | 0.24 | NA     | NA    | NA    | NA    | 718.72 | 0.06 | 0.18 |
| E6 | Pouteria torta           | Sapotaceae      | 1000 | LateSucTall  | 86.02  | 75.43   | 0.17 | 503.68 | 15.85 | 32.15 | 23.80 | 536.21 | 0.08 | 0.20 |
| E6 | Leonia crassa            | Violaceae       | 1000 | LateSucTall  | 93.80  | 180.23  | 0.28 | 449.55 | 20.45 | 22.19 | 16.54 | 680.22 | 0.08 | 0.21 |
| E7 | Saurauia JH5994          | Actinidiaceae   | 1000 | Pioneer      | 129.13 | 239.50  | 0.21 | 448.41 | 19.04 | 23.68 | 15.72 | 737.71 | 0.08 | 0.19 |
| E7 | Chrysochlamys sp         | Clusiaceae      | 1000 | LateSucSmall | 100.99 | 167.80  | 0.43 | 428.34 | 14.66 | 29.35 | 19.42 | 749.33 | 0.08 | 0.20 |
| E7 | Clusia ducuoides         | Clusiaceae      | 2000 | LateSucTall  | 59.41  | 19.59   | 0.53 | 494.24 | 12.34 | 40.14 | 16.04 | 726.64 | 0.08 | 0.21 |
| E7 | Meriania franciscana     | Melastomataceae | 2000 | MidSucTall   | NA     | NA      | 0.23 | NA     | NA    | NA    | NA    | 552.75 | 0.06 | 0.17 |
| E7 | Otoba parvifolia         | Myristicaceae   | 1000 | MidSucTall   | 98.46  | 97.37   | 0.32 | 477.55 | 15.63 | 30.76 | 17.44 | 718.44 | 0.08 | 0.21 |
| E7 | Hieronyma oblonga        | Phyllanthaceae  | 1000 | MidSucSmall  | 133.01 | 65.77   | 0.24 | 463.99 | 19.19 | 24.27 | 18.26 | 750.47 | 0.08 | 0.20 |
| E7 | Ladenbergia oblongifolia | Rubiaceae       | 1000 | MidSucTall   | 87.77  | 322.11  | 0.27 | 483.52 | 17.35 | 28.12 | 17.45 | 613.09 | 0.08 | 0.20 |
| E7 | Warszewiczia coccinea    | Rubiaceae       | 1000 | MidSucSmall  | 127.20 | 299.63  | 0.19 | 458.79 | 27.81 | 16.93 | 23.76 | 721.83 | 0.08 | 0.20 |
| E7 | Cecropia angustifolia    | Urticaceae      | 2000 | Pioneer      | 60.14  | 1354.33 | 0.28 | 0.00   | 0.00  | 0.00  | 0.00  | 653.67 | 0.08 | 0.20 |
| E8 | Clethra revoluta         | Clethraceae     | 3000 | LateSucSmall | 55.09  | 38.35   | 0.39 | 481.53 | 14.44 | 33.54 | 14.96 | 636.15 | 0.07 | 0.19 |
| E8 | Weinmannia microphylla   | Cunoniaceae     | 2000 | LateSucSmall | 98.83  | 7.23    | 0.24 | 480.80 | 12.75 | 38.06 | 18.49 | 608.50 | 0.07 | 0.19 |
| E8 | Aiouea dubia             | Lauraceae       | 3000 | LateSucTall  | 58.23  | 17.22   | 0.34 | 488.12 | 17.59 | 28.16 | 15.70 | 574.77 | 0.07 | 0.20 |
| E8 | Matayba ineleans         | Sapindaceae     | 2000 | LateSucSmall | 95.76  | 26.62   | 0.22 | 501.03 | 25.17 | 20.00 | 19.01 | 618.16 | 0.07 | 0.20 |

|    |                      |              |      |          |       |       |      |        |       |       |       |        |      |      |
|----|----------------------|--------------|------|----------|-------|-------|------|--------|-------|-------|-------|--------|------|------|
| E8 | Siparuna<br>muricata | Siparunaceae | 3000 | EarlySuc | 86.99 | 41.98 | 0.29 | 457.38 | 29.64 | 15.68 | 12.86 | 788.03 | 0.07 | 0.19 |
|----|----------------------|--------------|------|----------|-------|-------|------|--------|-------|-------|-------|--------|------|------|

Table S5. NIR albedo correlations (Spearman's rho) by excluding the single-species TFTs. As stressed in the main text, R-TFT1 NIR albedo is mainly related to the exceptionally high leaf N content, which masks the correlation between NIR albedo, altitude, SLA, and leaf water.

|                        | Elevation | SLA   | LT   | LWC   | N     |
|------------------------|-----------|-------|------|-------|-------|
| All R-TFTs (Figure S5) | -0.07     | -0.45 | 0.38 | -0.19 | -0.12 |
| - R-TFT 1              | 0.4       | -0.64 | 0.54 | -0.36 | -0.68 |
| - R-TFTs 1 and 3       | 0.12      | -0.49 | 0.37 | -0.6  | -0.54 |

**Figure S1:**  
Correlation matrix of  
commonly used leaf  
optical metrics (see  
Table 1.). Color  
brightness indicates  
strength of  
correlation.

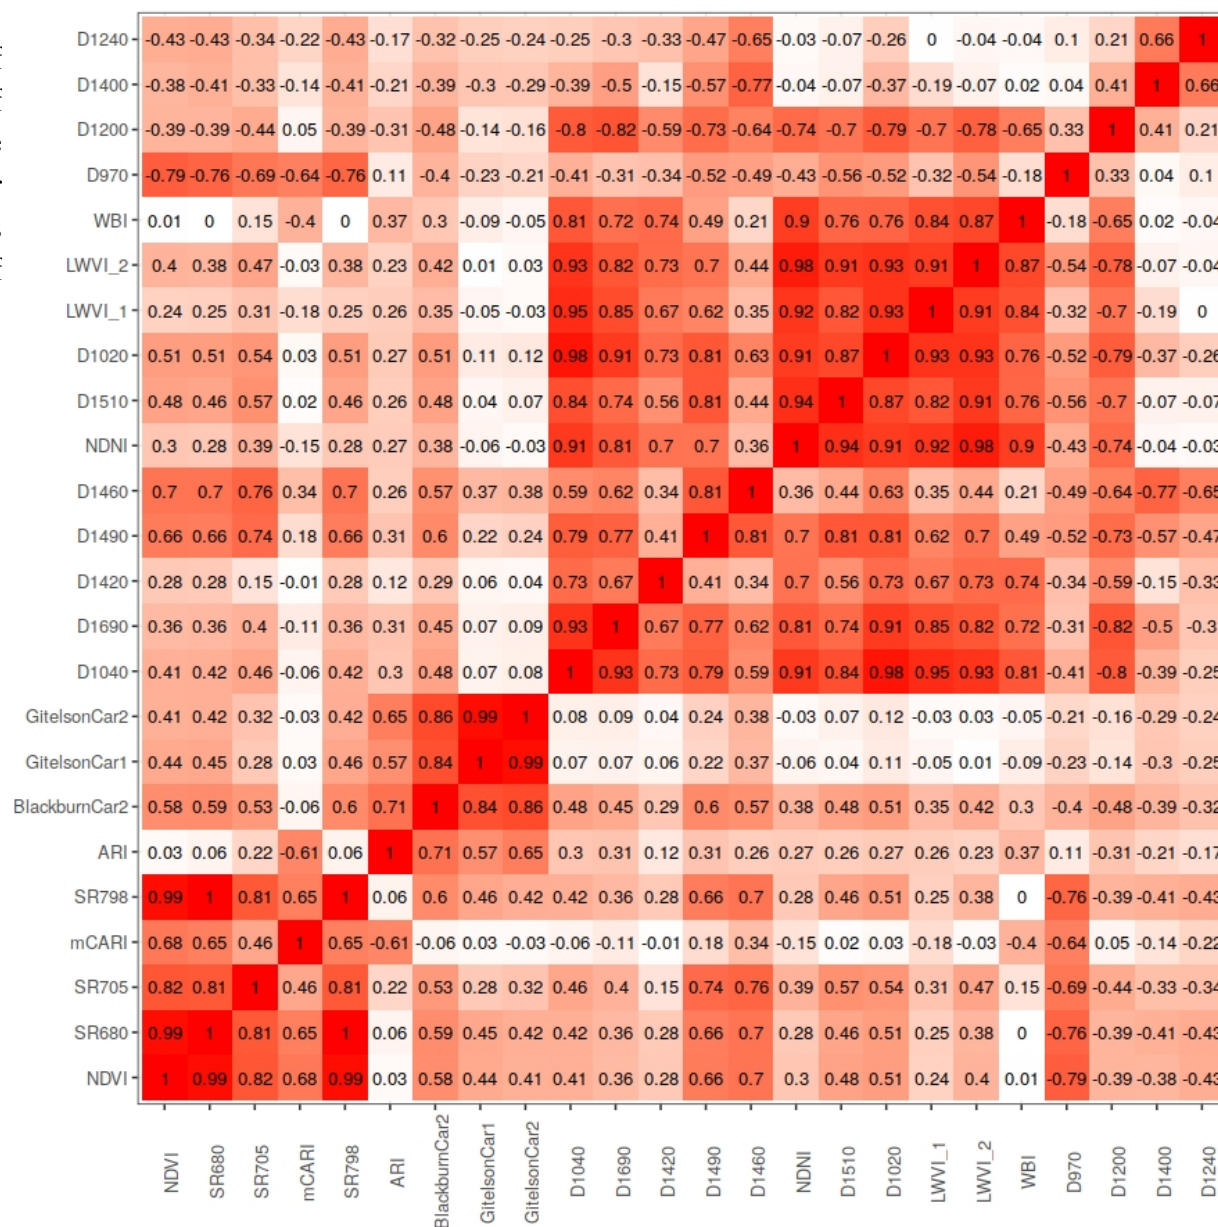



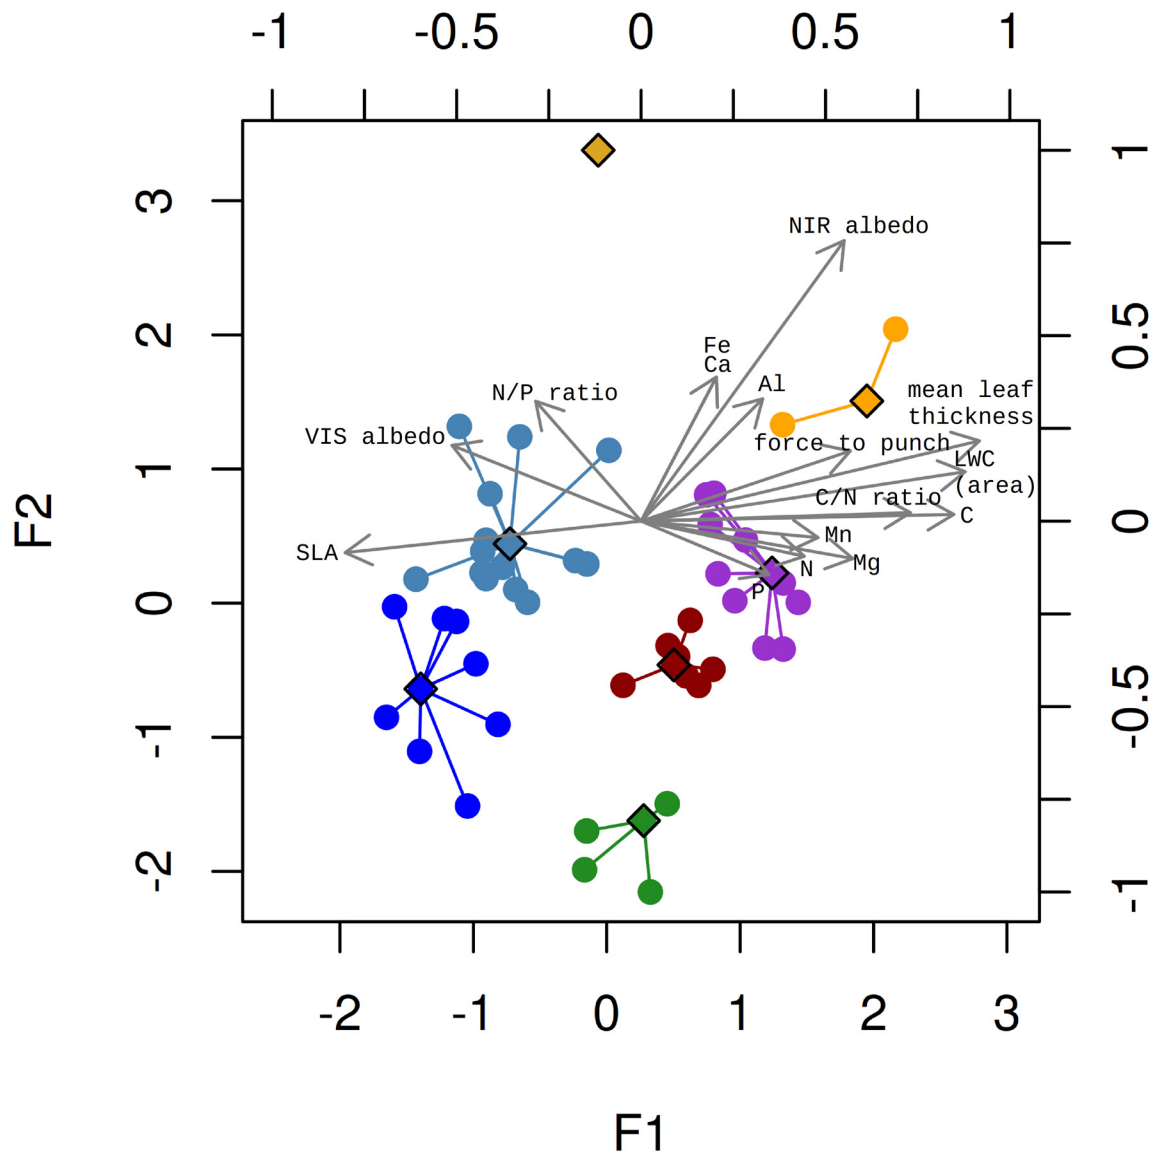

**Figure S2.** Clustering in the bivariate factor space for the ecosystem function of productivity. Cluster centers are marked by rectangles. Species scores are colored according to the P-TFT to which they were assigned. P1 = orange, P2 = red, P3 = violet, P4 = green, P5 = yellow, P6 = light blue, and P7 = dark blue. Productivity increases with decreasing species F1 scores and increasing F2 scores. F1 scores correlate with nutrient supply, and F2 scores are correlated with N/P-ratio, Fe and Ca. Gray arrows indicate significant correlation between leaf functional traits and species factor scores.

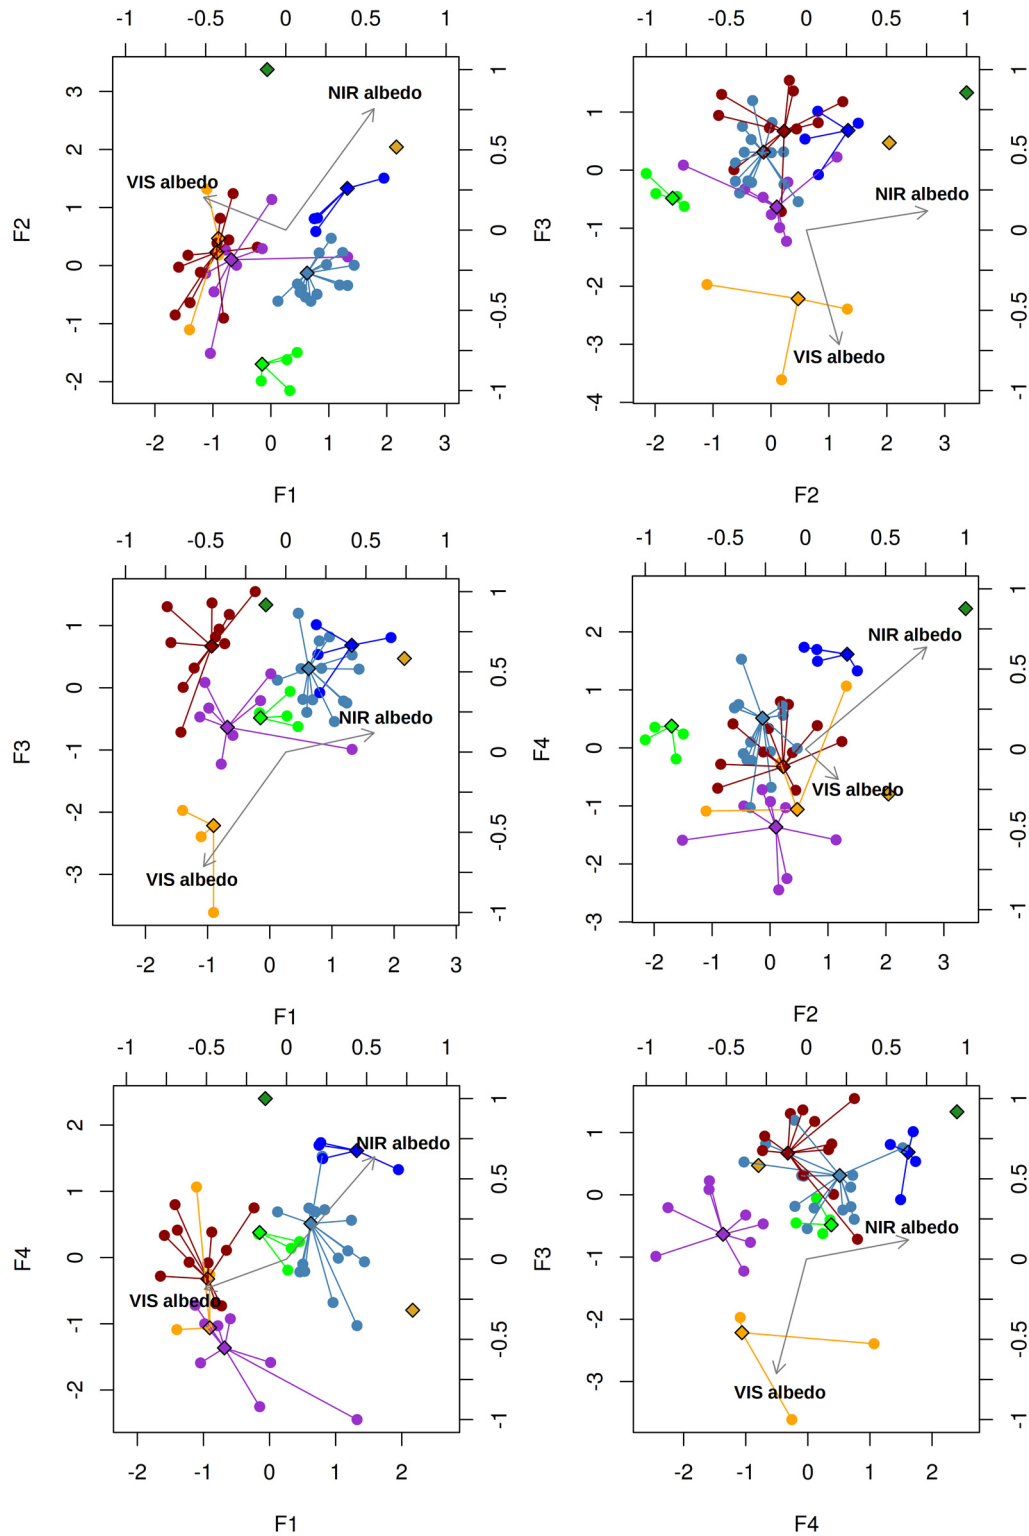

**Figure S3.** Clustering of the complete factor space. Cluster centers are marked by rectangles. Species scores are colored according to their assigned R-TFT: R1 = dark green, R2 = blue, R3 = yellow, R4 = light blue, R5 = orange, R6 = red, R7 = violet, and R8 = light green. Gray arrows indicate significant correlations between albedo and factor scores. F1 correlated negatively with

VIS albedo and positively with NIR albedo, thus positively affecting potential latent heat flux and negatively affecting potential sensible heat flux. F2 showed positive correlation with NIR albedo, which may lower potential sensible heat fluxes. F3 was negatively correlated with VIS albedo, thus increasing potential latent heat flux.

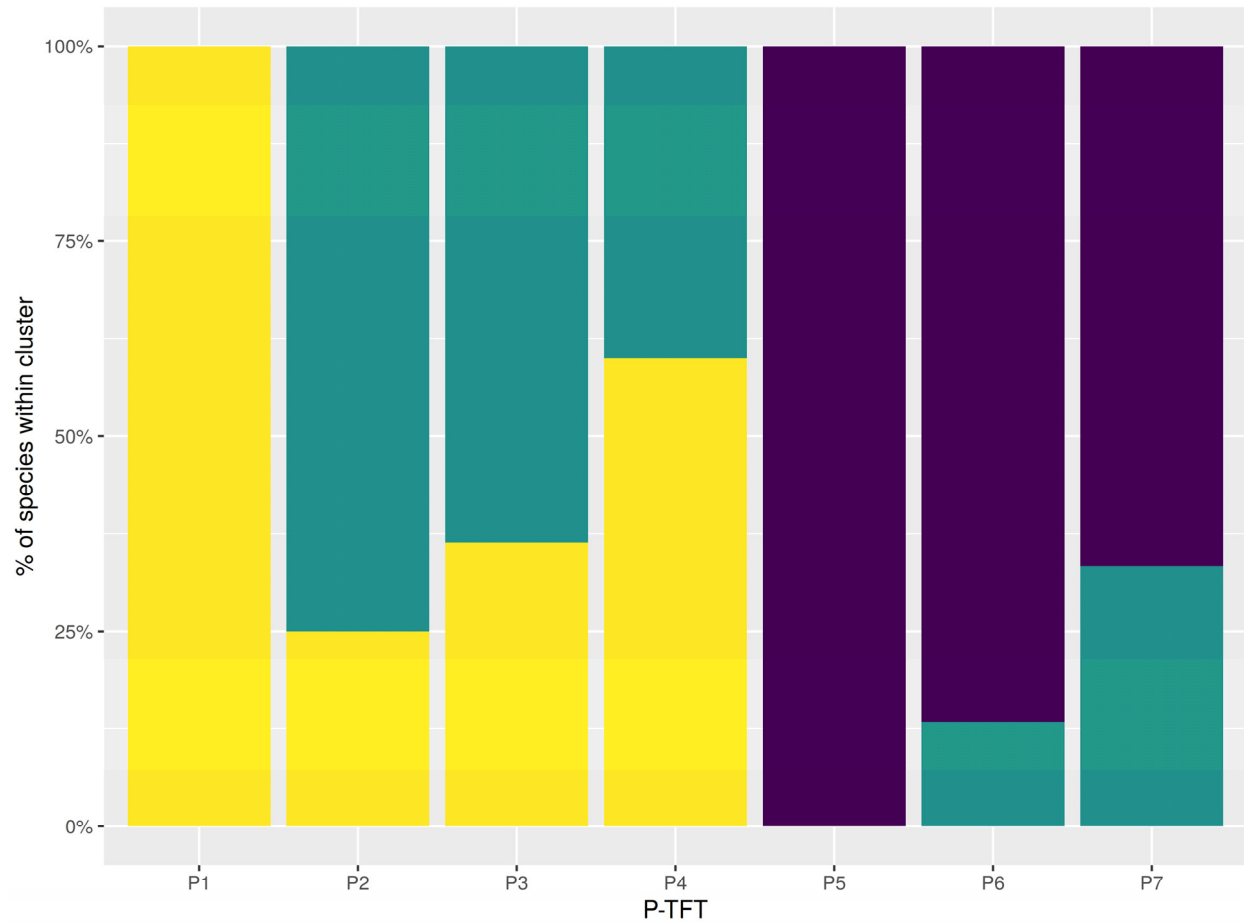

**Figure S4.** Altitudinal distribution of P-TFTs along the elevation gradient (for TFT, refer to Table 3 of the main text). Violet = 1000 m a.s.l., green = 2000 m a.s.l., and yellow = 3000 m a.s.l. TFTs P1-P4 mainly occur in the mid and higher parts of the study area. TFTs P5-P7 are dominated by species in the lower parts of the study area.

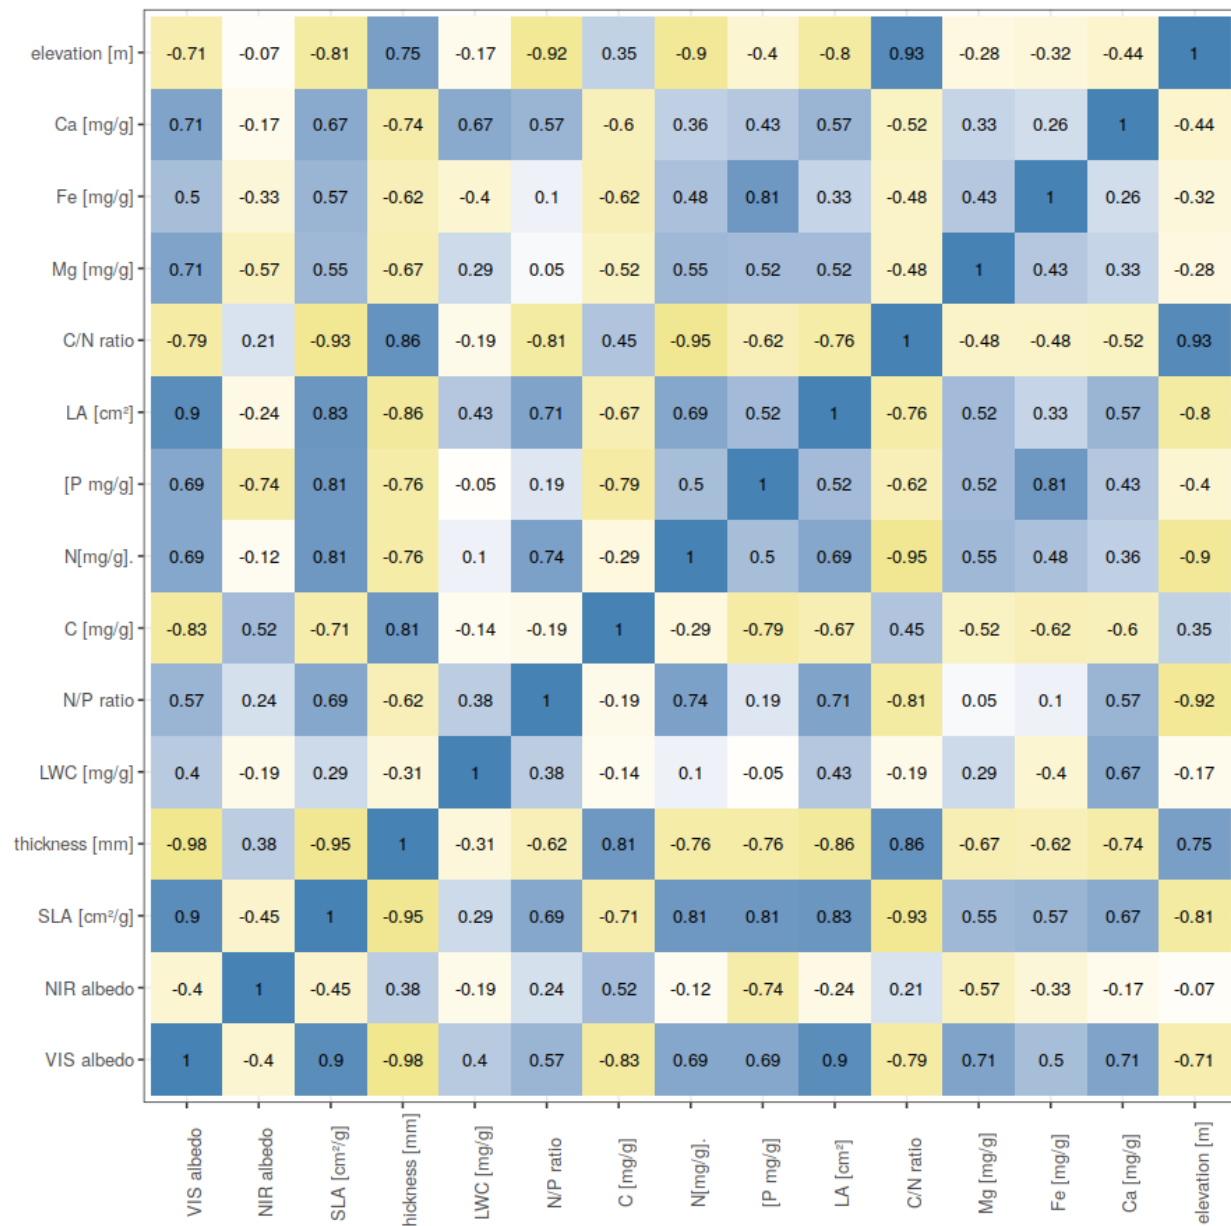

**Figure S5.** Cross-correlation matrix (Spearman's rho) of the R-TFT VIS and NIR and albedo with the median values of the functional traits (SLA = specific leaf area, LWC = leaf water content, and elevation = average elevation of species sampling) Figure S4 reveals a weak negative correlation ( $\rho = -0.4$ ) between VIS and NIR albedo of the R-TFTs. The highest correlation coefficients for VIS albedo were with leaf thickness ( $\rho = -0.98$ ), SLA/leaf area (both  $\rho = 0.9$ ), leaf carbon ( $-0.83$ ), and C:N ratio. Thus, structural leaf traits related to carbon and biomass are most relevant. The greater the carbon/structural biomass, the lower the VIS albedo because of higher leaf absorption. Of weaker importance are the biochemical leaf traits Mg and Ca ( $\rho$  of  $0.71$ ) as well as N and P ( $\rho = 0.69$ ). All traits are positively related to the chlorophyll content and thus enhance the VIS albedo particularly in the green wavebands. Striking is the high correlation between leaf Ca and leaf water content ( $0.67$ ). This occurred because the leaf Ca content is positively related to water fluxes in plants (e.g., transpiration; Gilliham et al. 2011). More complex is the relation between NIR albedo and leaf traits for the R-

TFTs. The positive relation with C ( $\rho = 0.52$ ) points to the reflectance potential of leaf structural elements in the NIR. The more structured the leaf, the higher the NIR albedo. This is confirmed by the negative relation with SLA. A negative relation with the biochemical leaf traits P ( $\rho = -0.74$ ) and Mg ( $\rho = -0.57$ ) is obvious, which are both relevant for chlorophyll content. However, both traits are negatively correlated with leaf thickness and carbon, which might explain the negative correlation coefficients of P and Mg with R-TFT NIR albedo. Leaf water is negatively related to NIR albedo, as expected from the water absorption bands in the NIR. However, the relation is weak for the R-TFTs. Notably, VIS albedo decreases with height, while no direct relation with height was found for NIR albedo. Here, the relation is indirect via elevation-dependent structural traits such as SLA. It should be stressed that excluding the one-species TFTs from cross-correlation clarifies the correlation patterns particularly for NIR albedo (see Table S5).

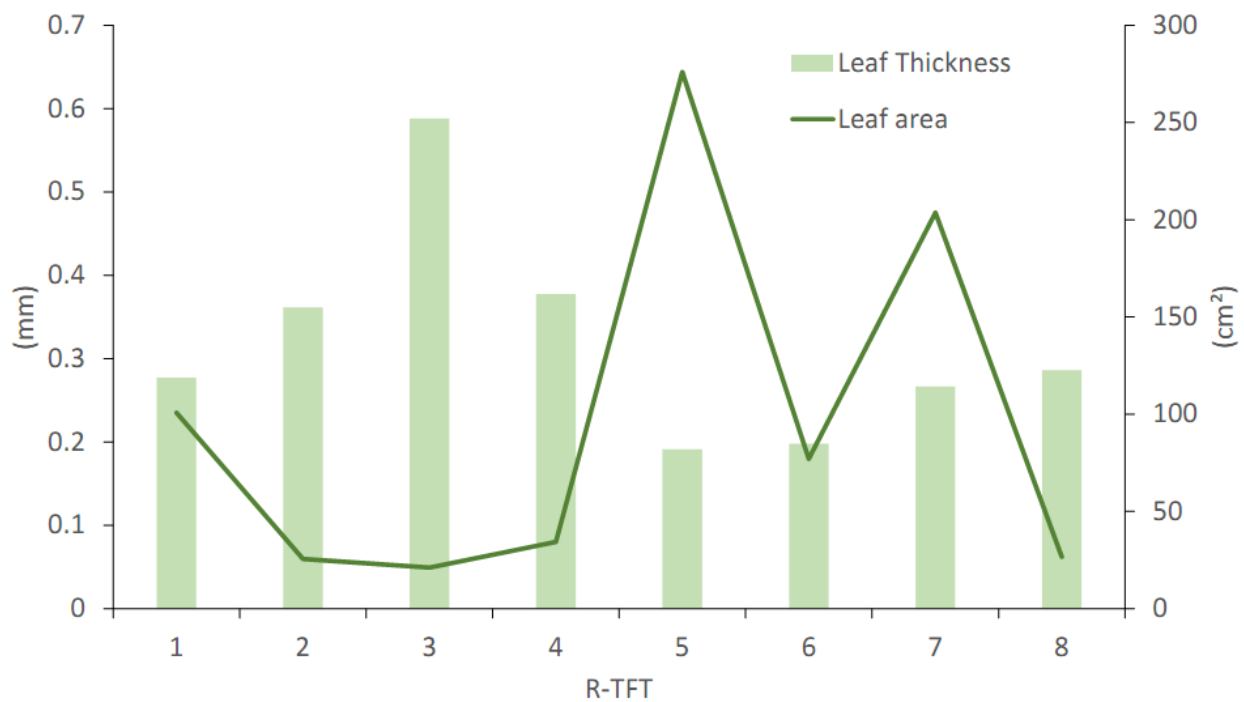

**Figure S6.** Leaf geometry for the R-TFT clusters. Leaf geometry clearly differs in the R-TFTs. Tree species of R-TFT groups 5 and 7 are characterized by large and thinner leaves, whereas the contrary is true for R-TFT 2-4. R-TFTs 1 and 6 reveal an intermediate thickness and leave size. The R-TFT with intermediate thickness but higher leave size is R-TFTs 7. R-TFT 8 is characterized by an intermediate leaf thickness and small leaves.

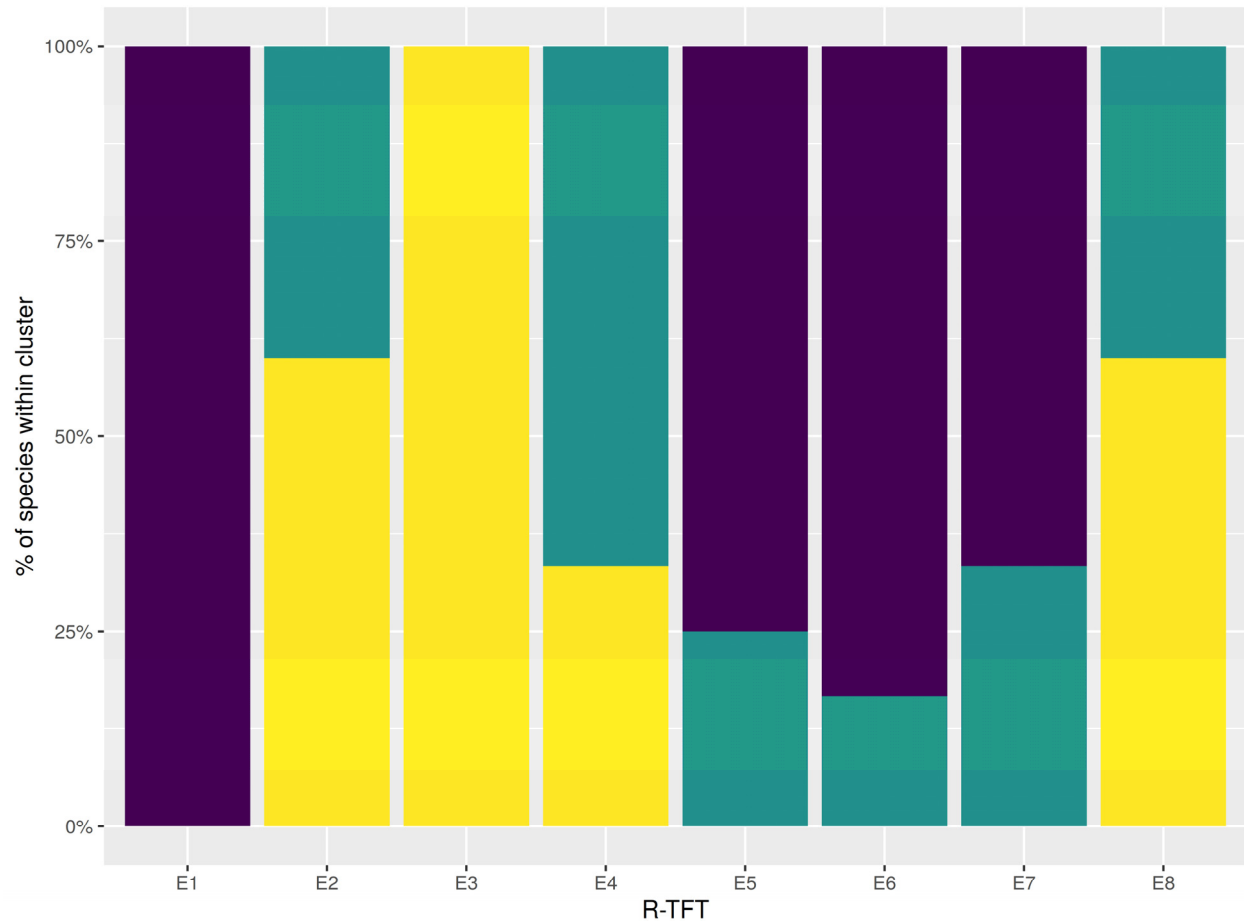

**Figure S7.** Altitudinal distribution of R-TFTs along the elevation gradient (for TFT number, refer to Table 4 of the main text). Violet = 1000 m a.s.l., green = 2000 m a.s.l., and yellow = 3000 m a.s.l. R-TFTs 2-4 and 8 mainly occur in the mid and higher parts of the study area. These are generally the species with greater leaf thickness and smaller leaf size (Figure S5). The bigger and thinner leaves of the R-TFTs 1 and 5-7 are mostly related to the species of the lower parts of the study area.

#### References:

Gilliam, M., Dayod, M., Hocking, B.J., Xu, B., Conn, S.J., Kaiser, B.N., Leigh, R.A. and Tyerman, S.D., 2011. Calcium delivery and storage in plant leaves: exploring the link with water flow. *Journal of experimental botany*, 62(7), pp.2233-2250.
